# Supplementary material
Source: MDPI journal article supplement (https://www.mdpi.com/2076-3417/13/13/7907)
Supplement: s1 [file s1]

## Supplementary file

The synthesis process of MnO<sub>2</sub> ( $\alpha$ -,  $\beta$ - and  $\gamma$ ) has been shown by equations S1 and S2. The equation represents the process of  $\alpha$ - MnO<sub>2</sub>, whereas the equation S2, represent the synthesis of  $\beta$ - and  $\gamma$ -MnO<sub>2</sub>.

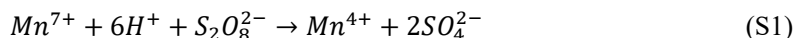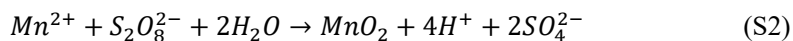

**Table S1:** Comparison of electrochemical performance with previously reported studies.

| S. No. | Material                             | Specific Capacitance (F/g) | Electrolyte                           | Reference |
|--------|--------------------------------------|----------------------------|---------------------------------------|-----------|
| 1.     | MnO <sub>2</sub>                     | 90                         | 0.5 M Na <sub>2</sub> SO <sub>4</sub> | 1         |
| 2.     | MnO <sub>2</sub>                     | 87                         | 6M KOH                                | 2         |
| 3.     | MnO <sub>2</sub>                     | 98                         | 2M NaOH                               | 3         |
| 4.     | Na <sub>x</sub> MnO <sub>2</sub> /NF | 133.2                      | 0.5 M Na <sub>2</sub> SO <sub>4</sub> | 4         |
| 5.     | NiO                                  | 132                        | 1M KOH                                | 5         |
| 6.     | F-ZnO                                | 12.2                       | 3M KOH                                | 6         |
| 7.     | $\alpha$ -MnO <sub>2</sub>           | 138                        | 1M Na <sub>2</sub> SO <sub>4</sub>    | This Work |

## References

1. Arkhipova, E.A.; Ivanov, A.S.; Isaikina, O.Y.; Novotortsev, R.Y.; Stolbov, D.N.; Xia, H.; Savilov, S.V. Application of MnO<sub>2</sub>/MWCNT composite in supercapacitors. *Materials Today: Proceedings* **2022**, *60*, 1008-1011.
2. Aquino, C.L.E.; Gorospe, A.E.; Rezaga, B.F.Y.; Avila, R.A.M.; Macugay, J.K.; Tercero, J.U.; Balela, M.D.L. Effect of ammonium persulfate on the growth of MnO<sub>2</sub> nanostructures prepared via hydrothermal synthesis for supercapacitor applications. *Materials Today: Proceedings* **2020**, *33*, 1945-1948.
3. Wickramaarachchi, K.; Minakshi, M. Consequences of electrodeposition parameters on the microstructure and electrochemical behavior of electrolytic manganese dioxide (EMD) for supercapacitor. *Ceramics International* **2022**, *48*(14), 19913-19924.
4. Xie, Y. Electrochemical properties of sodium manganese oxide/nickel foam supercapacitor electrode material. *Inorganic and Nano-Metal Chemistry* **2022**, *52*(4), 548-555.
5. Dhas, S.D.; Maldar, P.S.; Patil, M.D.; Nagare, A.B.; Waikar, M.R.; Sonkawade, R.G.; Moholkar, A. V. Synthesis of NiO nanoparticles for supercapacitor application as an efficient electrode material. *Vacuum* **2020**, *181*, 109646.
6. Erdemir, F.; Tuzcu, E.; Bilgin, S.; Alver, Ü.; Çanakçı, A. Influence of fluorine doping of zinc oxide on its electrochemical performance in supercapacitors. *Materials Chemistry and Physics* **2021**, *259*, 124033.
